# Supplementary material
Source: ML conference proceedings conference paper supplement (https://openaccess.thecvf.com/content/CVPR_2019/html/Shakeri_Moving_Object_Detection_CVPR_2019_paper.html)
Supplement: Supplementary file 1 [file Shakeri_Moving_Object_Detection_CVPR_2019_supplemental.pdf]

(listing pending)
